# Supplementary material
Source: PubMed Central journal article supplement (PMC2267408)
Supplement: bj4070089add.pdf [file bj4070089add.pdf]

**Supplementary material**

**DOES HUMAN NEUROGLOBIN ACT ONLY AS A SCAVENGER? REACTIVITY AND ENDOGENOUS MODIFICATION BY NITRITE AND HYDROGEN PEROXIDE\***

Stefania Nicolis<sup>\*</sup>, Enrico Monzani<sup>\*</sup>, Chiara Ciaccio<sup>†</sup>, Paolo Ascenzi<sup>‡</sup>, Luc Moens<sup>§</sup>, and Luigi Casella<sup>\*</sup>

<sup>\*</sup>Dipartimento di Chimica Generale, Università di Pavia, Via Taramelli 12, 27100 Pavia, Italy,

<sup>†</sup>Dipartimento di Medicina Sperimentale e Scienze Biochimiche, Università di Roma-Tor Vergata,

Via Montpellier 1, 00133 Roma, Italy, <sup>‡</sup>Dipartimento di Biologia, Università “Roma Tre”, Viale

Guglielmo Marconi 446, 00146, Roma, Italy, <sup>§</sup>Department of Biomedical Sciences, University of Antwerp, Universiteit 1, B-2610 Antwerp, Belgium

**Table S1. Mass Spectrometry Data of the Modified Peptides.** Molecular weights and  $m/z$  values of the modified peptide fragments identified in NGB derivatives by MS analysis. <sup>a</sup>The mass increments with respect to the molecular weights of the unmodified peptides are indicated in parentheses.

| <b>Modified residues</b>                  | <b>Peptides</b> | <b>MW (amu)<sup>a</sup></b> | <b><math>m/z</math> Bicharged ions</b> |
|-------------------------------------------|-----------------|-----------------------------|----------------------------------------|
| Y44-NO <sub>2</sub>                       | 31-47           | 2097.4 (+ 45)               | 1049.7                                 |
| Y88-NO <sub>2</sub>                       | 68-94           | 2953.3 (+ 45)               | 1477.6                                 |
| Y115-NO <sub>2</sub>                      | 103-119         | 1949.2 (+ 45)               | 975.6                                  |
| Y137-NO <sub>2</sub>                      | 131-146         | 1783.0 (+ 45)               | 892.5                                  |
| C46-SO <sub>2</sub> H                     | 31-47           | 2084.4 (+ 32)               | 1043.2                                 |
| C46-SO <sub>2</sub> H/Y44-NO <sub>2</sub> | 31-47           | 2129.4 (+ 77)               | 1065.7                                 |
| C46-SO <sub>3</sub> H                     | 31-47           | 2100.4 (+ 48)               | 1051.2                                 |
| C46-SO <sub>3</sub> H/Y44-NO <sub>2</sub> | 31-47           | 2145.4 (+ 93)               | 1073.7                                 |
| C55-SO <sub>2</sub> H                     | 48-66           | 2239.4 (+ 32)               | 1120.7                                 |
| C55-SO <sub>3</sub> H                     | 48-66           | 2255.4 (+ 48)               | 1128.7                                 |
| C120-SO <sub>2</sub> H                    | 120-130         | 1165.3 (+ 32)               | 583.7                                  |
| C120-SO <sub>3</sub> H                    | 120-130         | 1181.3 (+ 48)               | 591.7                                  |
